# Supplementary material for: Physiological Changes in Chicken Embryos Inoculated with Drugs and Viruses Highlight the Need for More Standardization of this Animal Model
Source: MDPI journal article supplement (doi:10.3390/ani12091156), 2022-04-29
Supplement: s1 [file s1]

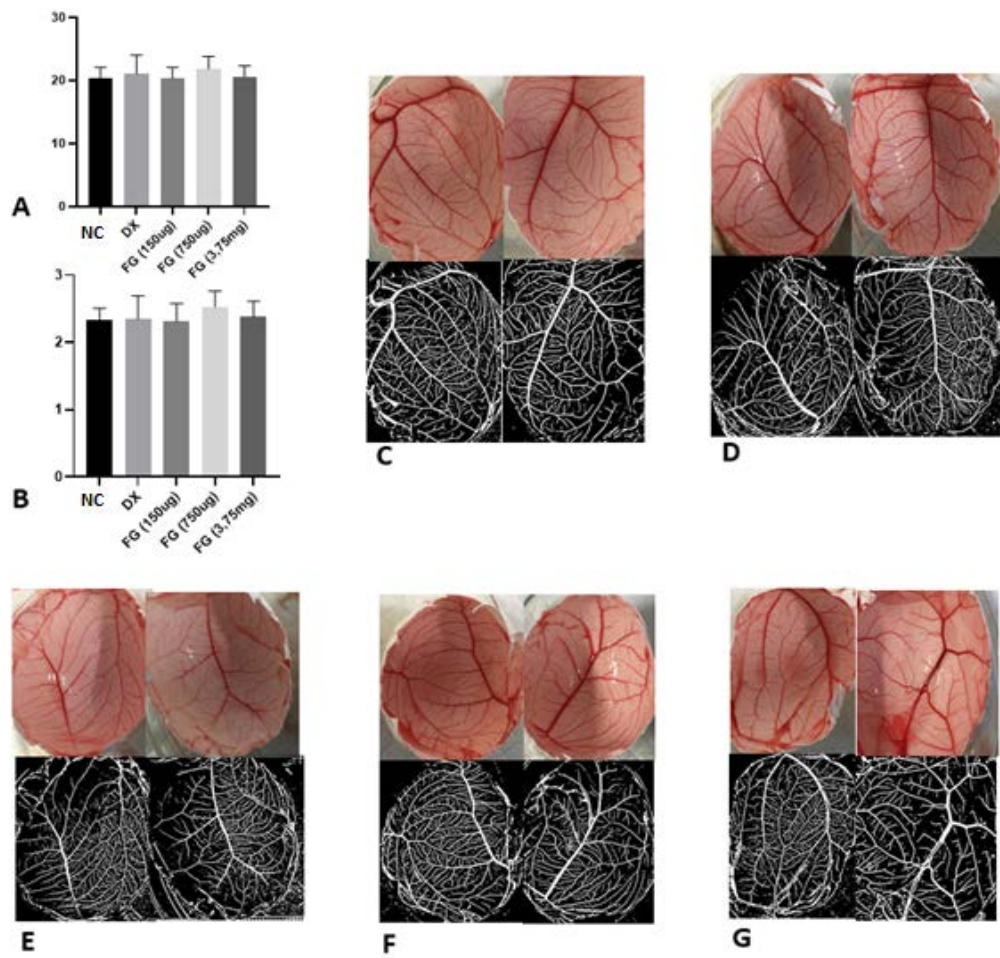

**Figure S1.** Angiogenesis was measured by vascular density and vessel length density using the software ImageJ with the plugin Vessels Analysis 58. The CE was inoculated at 3 EID and evaluated at 12 EID. (A) vascular density, (B) vessel length density, (C) Photos CAM (NC), (D) Photo CAM treated with DX, (E) Photo CAM treated with FG (150 µg/CE), (F) Photo CAM treated with FG (750µg/CE), (G) Photo CAM treated with FG (3.75 mg/CE).

**Table S1.** Maximum and minimum values and median of hematological analysis from CE infected with *Gammacoronavirus* and NC.

|                                | Virus |        |        | NC     |        |        |
|--------------------------------|-------|--------|--------|--------|--------|--------|
|                                | Minim | Maxim  | Median | Minim  | Maxim  | Median |
| Hc                             | 13    | 18     | 15     | 19     | 23     | 21     |
| Hb 1/3Hc                       | 4.33  | 6.00   | 5.00   | 6.33   | 7.67   | 7.00   |
| Hb Cyanmetemoglobin            | 5.02  | 7.39   | 6.60   | 7.70   | 8.23   | 8.09   |
| Erithrocytes × 10 <sup>6</sup> | 1.22  | 1.79   | 1.68   | 1.90   | 2.24   | 2.02   |
| MCV                            | 80.81 | 121.10 | 92.99  | 83.33  | 147.50 | 87.21  |
| MCH                            | 32.37 | 42.74  | 37.70  | 29.88  | 58.28  | 38.40  |
| MCHC                           | 35.00 | 47.06  | 39.53  | 35.86  | 44.13  | 39.60  |
| Leukocytes                     | 3500  | 54,000 | 6000   | 5500   | 11,000 | 7750   |
| Heterophils                    | 3325  | 45,360 | 5640   | 5280   | 10,340 | 6788   |
| Lymphocytes                    | 70    | 6480   | 180    | 120    | 1710   | 385    |
| Monocytes                      | 0     | 1080   | 70     | 0      | 110    | 0      |
| Eosinophils                    | 0     | 0      | 0      | 0      | 0      | 0      |
| Thrombocytes                   | 9000  | 51,500 | 19,000 | 18,000 | 29,500 | 20,500 |

**Table S2.** Maximum and minimum values and median of metabolites and minerals from the serum and AF of CE from CE infected with *Gammacoronavirus* and NC.

|       |         | Serum |       | Allantoic |       |
|-------|---------|-------|-------|-----------|-------|
|       |         | Virus | NC    | Virus     | NC    |
| UA    | Minimum | 4.24  | 1.27  | 7.15      | 1.27  |
|       | Maximum | 36.94 | 50.07 | 85.39     | 50.07 |
|       | Median  | 24.67 | 17.85 | 56.93     | 11.39 |
| Creat | Minimum | 0.19  | 0.26  | 0.33      | 1.63  |
|       | Maximum | 0.96  | 2.94  | 2.75      | 4.92  |
|       | Median  | 0.435 | 1.235 | 1.05      | 3.155 |
| ALP   | Minimum | 235.7 | 736.5 | 18.2      | 58.2  |
|       | Maximum | 3845  | 3388  | 123.1     | 82.9  |
|       | Median  | 2476  | 1651  | 24.1      | 68.1  |
| GGT   | Minimum | 10.2  | 77.4  | 40        | 58    |
|       | Maximum | 136   | 356   | 434       | 346   |
|       | Median  | 89.6  | 288   | 183       | 166   |
| ALT   | Minimum | 24    | 40    | 20        | 20    |
|       | Maximum | 100   | 220   | 120       | 80    |
|       | Median  | 53    | 54    | 60        | 40    |
| AST   | Minimum | 54    | 120   | 120       | 220   |
|       | Maximum | 560   | 780   | 380       | 920   |
|       | Median  | 221   | 452   | 150       | 640   |
| Ca    | Minimum | 2.5   | 20.5  | 4.4       | 10.4  |
|       | Maximum | 21.5  | 146.4 | 39        | 34.2  |
|       | Median  | 8.45  | 118.8 | 14.2      | 15.8  |
| P     | Minimum | 2.7   | 1.4   | 2.5       | 11.6  |
|       | Maximum | 8.4   | 9.7   | 18.3      | 29.4  |
|       | Median  | 5.45  | 8.1   | 8.7       | 17.7  |
| CRP   | Minimum | 10.8  | 15    | 26        | 40    |
|       | Maximum | 35.4  | 38    | 100       | 152   |
|       | Median  | 26    | 23    | 56        | 86    |

**Table S3.** Maximum and minimum values and median of hematological analysis from CE treated with DX at 10 EID and their respective NC.

|              | NC        |           |           | DX        |           |           |
|--------------|-----------|-----------|-----------|-----------|-----------|-----------|
|              | Minimum   | Maximum   | Median    | Minimum   | Maximum   | Median    |
| Hc           | 17.0      | 22.0      | 20.5      | 13.0      | 21.0      | 17.5      |
| Hb 1/3Hc     | 5.67      | 7.33      | 6.84      | 4.33      | 7.00      | 5.84      |
| Hb Drabkin   | 6.48      | 8.75      | 7.86      | 5.16      | 8.75      | 7.38      |
| Erythrocytes | 1,730,000 | 2,530,000 | 2,012,500 | 1,205,000 | 1,940,000 | 1,537,500 |
| MCV          | 86.96     | 112.50    | 98.78     | 95.74     | 135.30    | 108.10    |
| MCH          | 34.58     | 40.91     |           | 40.98     | 64.00     |           |
| MCHC         | 35.00     | 41.63     | 39.04     | 37.56     | 47.45     | 42.71     |
| Leukocytes   | 1000      | 5000      | 4000      | 500       | 7500      | 2500      |
| Heterophils  | 980       | 4500      | 3600      | 495       | 6300      | 2300      |
| Lymphocytes  | 20        | 810       | 210       | 5         | 1200      | 200       |
| Monocytes    | 0         | 0         | 0         | 0         | 0         | 0         |
| Eosinophils  | 0         | 45        | 0         | 0         | 210       | 0         |
| Thrombocytes | 11,500    | 22,500    | 14,000    | 1000      | 15,500    | 8500      |

**Table S4.** Maximum and minimum values and median of hematological analysis from CE treated with FG at 10 EID and their respective NC.

|              | NC        |           |           | FG        |           |           |
|--------------|-----------|-----------|-----------|-----------|-----------|-----------|
|              | Minimum   | Maximum   | Median    | Minimum   | Maximum   | Median    |
| Hc           | 19.0      | 28.0      | 21.0      | 14.0      | 25.0      | 17.0      |
| Hb 1/3Hc     | 6.33      | 9.33      | 7.00      | 4.67      | 8.33      | 5.67      |
| Hb Drabkin   | 7.08      | 9.17      | 8.09      | 5.58      | 9.76      | 7.76      |
| Erythrocytes | 1,125,000 | 2,600,000 | 1,772,500 | 1,135,000 | 1,995,000 | 1,760,000 |

|              |       |        |        |       |        |        |
|--------------|-------|--------|--------|-------|--------|--------|
| MCV          | 92.39 | 125.30 | 104.20 | 76.92 | 195.60 | 138.80 |
| MCH          | 31.24 | 75.29  | 48.04  | 36.19 | 50.04  | 44.19  |
| MCHC         | 32.75 | 42.70  | 37.63  | 38.15 | 49.21  | 39.63  |
| Leukocytes   | 2000  | 8500   | 3000   | 500   | 8500   | 3250   |
| Heterophils  | 1780  | 8160   | 2880   | 475   | 7735   | 3218   |
| Lymphocytes  | 60    | 340    | 120    | 25    | 640    | 150    |
| Monocytes    | 0     | 0      | 0      | 0     | 85     | 0      |
| Eosinophils  | 0     | 0      | 0      | 0     | 0      | 0      |
| Thrombocytes | 5750  | 34,000 | 14,250 | 2500  | 39,500 | 7000   |

**Table S5.** Maximum and minimum values and median of metabolites and minerals from the serum and AF of CE treated with FG and DX inoculated at 10 EID and their respective NC.

|       |        | Serum |       | Allantoic |       | Serum |       | Allantoic |       |
|-------|--------|-------|-------|-----------|-------|-------|-------|-----------|-------|
|       |        | NC    | DX    | NC        | DX    | NC    | FG    | NC        | FG    |
| UA    | Minim  | 1.83  | 0.63  | 17.52     | 0.76  | 2.53  | 2.64  | 33.65     | 17.46 |
|       | Maxim  | 32.13 | 22.8  | 115.4     | 129.9 | 22.15 | 38.71 | 127.8     | 174.7 |
|       | Median | 10.82 | 12.21 | 53.24     | 76.43 | 9.835 | 7.98  | 109.4     | 82.23 |
| Creat | Minim  | 0.15  | 0.12  | 2.7       | 1.1   | 0.41  | 0.28  | 1.81      | 2.16  |
|       | Maxim  | 1.08  | 3.06  | 4.26      | 5.67  | 2.34  | 1.98  | 4.29      | 4.65  |
|       | Median | 0.51  | 0.695 | 3.735     | 2.18  | 1.14  | 0.51  | 2.16      | 3.01  |
| ALP   | Minim  | 562.6 | 904.1 | 9.1       | 21.5  | 1114  | 1830  | 8.5       | 9.8   |
|       | Maxim  | 4157  | 17399 | 130.9     | 150.8 | 3110  | 2661  | 98        | 126.3 |
|       | Median | 2460  | 2263  | 31.9      | 75    | 1404  | 2473  | 39.1      | 35.8  |
| GGT   | Minim  | 5.1   | 2.4   | 1.3       | 4.3   | 3.1   | 1.1   | 7.4       | 4.7   |
|       | Maxim  | 229   | 232   | 27        | 31    | 228   | 204   | 22.9      | 21    |
|       | Median | 14.4  | 16.4  | 8.35      | 17.8  | 33.3  | 28    | 13.95     | 12.9  |
| ALT   | Minim  | 14.8  | 25.8  | 6         | 2     | 5.6   | 6.2   | 2         | 2     |
|       | Maxim  | 437.9 | 428   | 10        | 21    | 118   | 364   | 15        | 29    |
|       | Median | 71.4  | 123   | 8         | 14.5  | 41.95 | 145.8 | 8         | 10    |
| AST   | Minim  | 11.7  | 39    | 5.9       | 6     | 15    | 39.8  | 3.2       | 4     |
|       | Maxim  | 63    | 200.4 | 31        | 20.8  | 74.4  | 71.5  | 31.1      | 17.9  |
|       | Median | 38.8  | 79.2  | 16        | 14    | 61.8  | 42.7  | 12.6      | 6     |
| Ca    | Minim  | 3.1   | 5.6   | 3.4       | 0.8   | 2.6   | 3.6   | 6.3       | 2.6   |
|       | Maxim  | 30.6  | 94.2  | 10.2      | 41.6  | 40    | 60    | 25.3      | 14.7  |
|       | Median | 5.3   | 20.9  | 5.8       | 12.1  | 16.9  | 9.8   | 10.04     | 6.3   |
| P     | Minim  | 1.79  | 0.28  | 15.6      | 16.1  | 2.34  | 2     | 4.7       | 11.1  |
|       | Maxim  | 10.8  | 13.2  | 32.5      | 47.6  | 15.8  | 9     | 29.5      | 37.2  |
|       | Median | 3.94  | 4.03  | 23.4      | 20.8  | 7.8   | 4.525 | 15.4      | 22    |

**Table S6.** Maximum and minimum values and median of metabolites and minerals from the serum of CE treated with FG and DX inoculated at 12 EID and NC.

|       |         | NC    | FG    | DX   |
|-------|---------|-------|-------|------|
| UA    | Minimum | 5.95  | 5.72  | 3.42 |
|       | Maximum | 10.5  | 30.18 | 28.8 |
|       | Median  | 8.7   | 7.93  | 5.34 |
| Creat | Minimum | 0.32  | 0.19  | 0.71 |
|       | Maximum | 2.76  | 1.3   | 1.92 |
|       | Median  | 1.62  | 0.42  | 1.47 |
| ALP   | Minimum | 1754  | 2071  | 1528 |
|       | Maximum | 2566  | 2980  | 2391 |
|       | Median  | 2200  | 2180  | 1896 |
| GGT   | Minimum | 9.6   | 5.6   | 2.7  |
|       | Maximum | 104.4 | 164   | 108  |
|       | Median  | 37.5  | 40.2  | 82.8 |
| ALT   | Minimum | 4.3   | 10.6  | 49.4 |
|       | Maximum | 150   | 534   | 95.4 |

|     |         |       |       |       |
|-----|---------|-------|-------|-------|
| AST | Median  | 58.2  | 22.5  | 75    |
|     | Minimum | 57.9  | 65.9  | 124.3 |
|     | Maximum | 259.2 | 175.8 | 1319  |
| Ca  | Median  | 112.2 | 104.4 | 390.3 |
|     | Minimum | 9.7   | 4.1   | 5.9   |
|     | Maximum | 32.4  | 31.5  | 28.8  |
| P   | Median  | 13.8  | 21.3  | 9.9   |
|     | Minimum | 1.1   | 1.5   | 5.9   |
|     | Maximum | 11.4  | 9     | 13.2  |
|     | Median  | 4.4   | 3.8   | 9.5   |

**Table S7.** Maximum and minimum values and median of hematological analysis from CE treated with FG and DX at 12 EID and NC.

|                                | NC    |        |        | FG    |        |        | DX     |        |        |
|--------------------------------|-------|--------|--------|-------|--------|--------|--------|--------|--------|
|                                | Minim | Maxim  | Median | Minim | Maxim  | Median | Minim  | Maxim  | Median |
| Hc                             | 23    | 31     | 30     | 24    | 34     | 29     | 18     | 26     | 26     |
| Hb 1/3Hc                       | 7.67  | 10.33  | 10.00  | 8.00  | 11.33  | 9.67   | 6.67   | 8.67   | 8.67   |
| Hb Drabkin                     | 8.00  | 14.08  | 9.34   | 8.58  | 12.13  | 10.62  | 6.90   | 9.76   | 7.84   |
| Erythrocytes × 10 <sup>6</sup> | 1.90  | 3.21   | 2.55   | 2.02  | 3.02   | 2.74   | 1.60   | 2.29   | 1.86   |
| MCV                            | 80.99 | 131.60 | 117.70 | 89.66 | 118.80 | 112.50 | 113.00 | 139.80 | 125.80 |
| MCH                            | 28.23 | 53.32  | 42.11  | 36.07 | 42.45  | 39.74  | 39.37  | 42.62  | 41.33  |
| MCHC                           | 31.14 | 45.43  | 34.86  | 31.14 | 43.58  | 35.55  | 30.17  | 37.54  | 32.87  |
| Leukocytes                     | 2500  | 5000   | 4250   | 2500  | 8000   | 4500   | 6000   | 30,000 | 14,000 |
| Heterophils                    | 2175  | 4500   | 3725   | 1800  | 7280   | 3893   | 5820   | 29,700 | 15,593 |
| Lymphocytes                    | 325.0 | 650.0  | 427.5  | 315   | 720    | 571    | 140    | 500    | 220    |
| Monocytes                      | 0.0   | 100.0  | 47.5   | 0     | 100    | 75     | 0      | 0      | 0      |
| Eosinophils                    | 0     | 0      | 0      | 0     | 0      | 0      | 0      | 0      | 0      |
| Thrombocytes                   | 4000  | 7500   | 5000   | 4000  | 7000   | 5750   | 6000   | 23,500 | 15,000 |
